# Supplementary material
Source: publisher figshare collection journal article supplement (https://tandf.figshare.com/ndownloader/files/15680903)
Supplement: Supplementary file 1 [file 15680903]

**Preparation of** **monodisperse magnetic surface molecularly imprinted polymers** **for selective recognition of lincomycin hydrochloride in milk**

**Figure 3.** XRD diffractogram of Fe3O4 and M-MIPs

**Figure 4.** Hysteresis loops of Fe3O4, Fe3O4/PVBC/DVB and M-MIPs

**Figure 5.** SEM images of Fe3O4/PVBC-DVB (A) and M-MIPs (B)

| 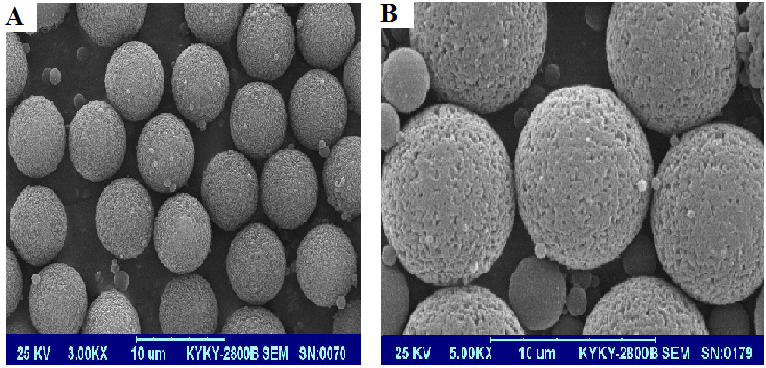  2μm  A | 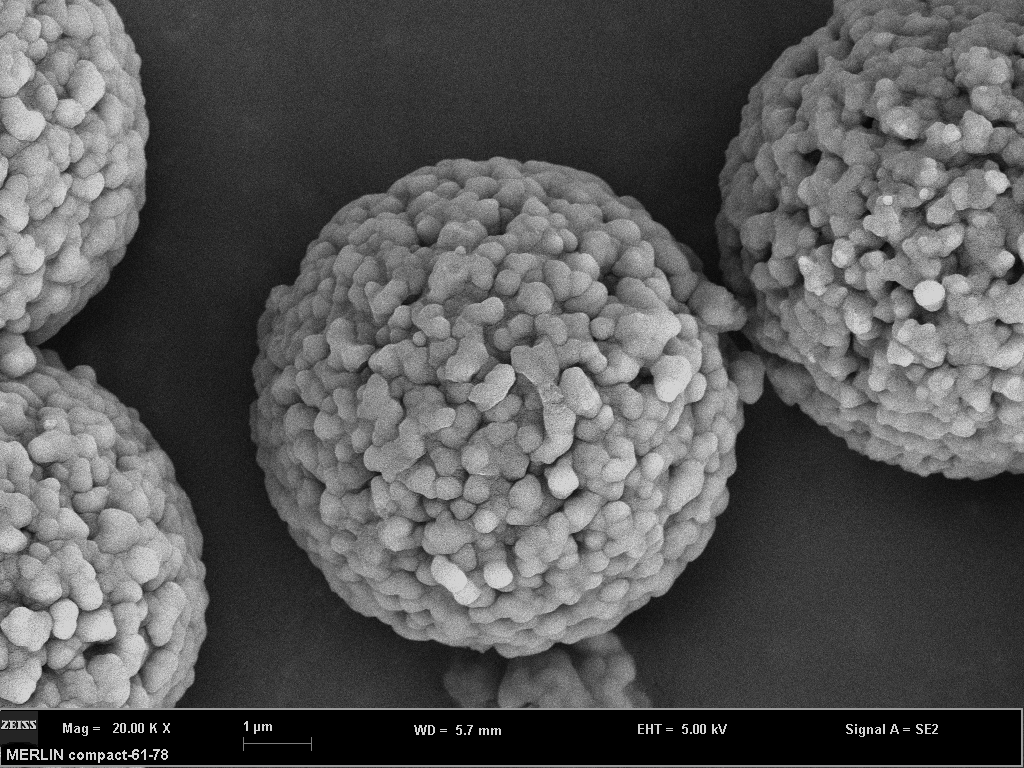  2μm  B |
| --- | --- |
